# Supplementary material
Source: PubMed Central journal article supplement (PMC3225449)
Supplement: supp_110670_drug-gamble-2-at.pdf [file supp_110670_drug-gamble-2-at.pdf]

**Appendix 2 (as supplied by authors): Time-to-listing for 53 drugs with a Common Drug Review recommendation, stratified by provincial and federal drug plan review times**

| <b>Variable</b>                                                                                                | <b>BC</b> | <b>AB</b> | <b>SK</b> | <b>MB</b> | <b>ON</b> | <b>NB</b> | <b>NS</b> | <b>PEI</b> | <b>NL</b> | <b>NIHB</b> | <b>QC</b> |
|----------------------------------------------------------------------------------------------------------------|-----------|-----------|-----------|-----------|-----------|-----------|-----------|------------|-----------|-------------|-----------|
| <b>Time from Notice of Compliance to listing for listed drugs (Total time-to-listing)</b>                      |           |           |           |           |           |           |           |            |           |             |           |
| Median (days)                                                                                                  | 644       | 524       | 337       | 398       | 692       | 479       | 366       | 512        | 325       | 492         | 301       |
| Range (days)                                                                                                   | 276-1707  | 198-1417  | 198-1421  | 272-1194  | 268-1411  | 255-1382  | 171-1466  | 259-976    | 109-1356  | 226-1387    | 173-1946  |
| Average (days)                                                                                                 | 727       | 564       | 578       | 504       | 726       | 560       | 458       | 582        | 492       | 584         | 455       |
| <b>Time from Common Drug Review recommendation to listing for listed drugs (Provincial Time)</b>               |           |           |           |           |           |           |           |            |           |             |           |
| Median (days)                                                                                                  | 291       | 163       | 130       | 227       | 233       | 194       | 99        | 358        | 127       | 232         | 48        |
| Range (days)                                                                                                   | 102-956   | 15-413    | 41-1195   | 112-1013  | 97-961    | 130-412   | 44-239    | 159-836    | 9-247     | 125-523     | -294-1744 |
| Average (days)                                                                                                 | 391       | 168       | 225       | 325       | 377       | 225       | 114       | 409        | 133       | 229         | 137       |
| <b>Time from Notice of Compliance to Common Drug Review recommendation for listed drugs (Federal Time)</b>     |           |           |           |           |           |           |           |            |           |             |           |
| Median (days)                                                                                                  | 238       | 241       | 241       | 171       | 241       | 240       | 241       | 160        | 238       | 226         | 257       |
| Range (days)                                                                                                   | 100-1044  | 93-1249   | 93-1249   | 93-353    | 93-1044   | 93-1249   | 93-1249   | 100-238    | 93-1249   | 100-1249    | 93-1044   |
| Average (days)                                                                                                 | 336       | 396       | 353       | 179       | 349       | 335       | 344       | 173        | 359       | 355         | 318       |
| <b>Time from Notice of Compliance to Common Drug Review recommendation for non-listed drugs (Federal Time)</b> |           |           |           |           |           |           |           |            |           |             |           |
| Median (days)                                                                                                  | 305       | 303       | 324       | 310       | 352       | 310       | 308       | 308        | 305       | 305         | 351       |
| Range (days)                                                                                                   | 93-1272   | 154-1272  | 189-1272  | 183-1272  | 202-1272  | 189-1272  | 154-1272  | 93-1272    | 154-1272  | 93-1272     | 181-1272  |
| Average (days)                                                                                                 | 396       | 371       | 396       | 426       | 419       | 410       | 402       | 410        | 387       | 390         | 484       |
